# Supplementary material for: Phosphatidylinositol 3-phosphate and Hsp70 protect Plasmodium falciparum from heat-induced cell death
Source: eLife. 2020 Sep 25;9:e56773. doi: 10.7554/eLife.56773 (PMC7518890; doi:10.7554/eLife.56773)
Supplement: Figure 2—source data 1. [file elife-56773-fig2-data1.xlsx]

## Sheet: DV MFI (AU)
no HS				HS
DMSO	Wort	LY294	LY303	DMSO	Wort	LY294	LY303
22276.4	37950.1	37576.4	51868.6	32689.7	48360.7	11719.5	30037.4
46119.5	27386.8	59884.7	49919.9	39171.8	7004.83	16089.9	41619.8
29357.9	41163.8	52318.8	41652.7	33882.2	65532.7	20109.7	37912.8
45183.2	57834.8	38673.2	39128.2	38262.8	31627.1	12364.9	46944.3
36814	40737.4	44213.5	42575.4	37355	23903.1	25612.7	44093.6
30871.4	25081.3	54710	56897.5	44021.1	65532.1	12684.4	27990.1
28442.2	54530.2	53251.4	59546	36630.3	62645.8	16094.5	34600.7
42689.7	41385.3	61175	33487	52168.2	55574	14102.5	51495.1
59434.1	36952.4	43124.9	47563.7	41643.5	65531.6	15773.4	35784.6
39530.4	38548.6	63084.1	35609.1	25191	22150.7	8817.25	33732.8
33730.3	48436.7	38553.4	35844	41329.7	35190	52435.1	29487
24865	35899.7	37675.6	32957.9	39963.3	35968.9	35107.3	21987.9
47576.5	50112.9	40061.3	54898.2	59505.3	50652.3	17553.6	43018.2
41980.1	30315.6	46983.9	37319.6	25311.8	53948.6	13479.3	42980.4
55821.8	34133.4	58154.2	39566.6	23725.6	42765	12668.9	43421.8
45154.3	55850.2	34507.3	49282.2	42463.3	27376.6	29235.7	59500.5
34055.9	39698.5	46491.9	53174.5	52672.8	4935.17	20581.1	23925.7
46393.2	55118.7	35507.9	31015.8	26553.6	63845.2	36051.2	19463.8
18458.5	37447.1	51642.8	59475.9	33420.9	65532	11932.6	15143.8
47206.3	39723	45668.1	36008	39456.2	19065.4	32091.7	32580.6
24384.6	45783.3	55777.5	47387.6	36786.5	25859.8	17516.5	51451.8
28704.3	31081.8	36572	26377.6	48876.4	32502.8	15978	44474.7
33902.7	17194.9	38360.3	24123.2	28225.8	20822.9	32489	25320.3
34700.1	38532.5	41724	48469.7	41798.6	31517.2	8911.32	38475.5
28758.8	51806.7	44779.3	43159.1		65532.9	15830.2	39045.1
			47473.2		62591.8	42627.8	50727.3
			50471.7		45220.6	13227	18882.4
					65003.5	13959.1	29784
						28609.5	28074.9
							35627.6

## Sheet: MFI ratio (DV non-DV)
no HS				HS
DMSO	Wort	LY294	LY303	DMSO	Wort	LY294	LY303
2.35337	1.33577	2.84638	4.94075	7.18771	1.77237	1.30377	7.38442
3.14011	1.31601	4.60109	5.49267	3.40233	0.537595	2.08354	3.1403
2.6108	1.49437	4.68519	3.43872	4.86204	1.66558	2.25594	8.43786
5.66756	2.29819	2.71586	3.02671	3.93247	2.39873	1.98247	5.0217
2.75288	2.55725	3.19942	4.6428	7.77084	1.03592	3.24686	6.36403
2.36883	1.06974	3.90131	3.66358	9.86556	1.66709	1.27558	5.36939
2.22207	2.25063	4.02679	4.85183	4.33059	1.97471	3.55445	5.01861
7.2902	1.4226	5.1088	3.39652	4.16065	1.70871	2.6588	8.795
4.76228	1.89027	2.98172	6.67986	5.31467	1.52734	1.74072	8.20376
2.41285	2.68672	3.608	4.21814	3.62579	1.817	1.33266	6.71968
4.4045	1.54267	2.52186	4.09891	4.36593	2.8884	4.17015	9.16634
4.56753	2.03331	4.59162	3.2831	5.21475	2.8822	2.51042	4.43001
2.81291	2.18277	3.43266	4.63364	9.21779	2.33618	6.50785	8.66334
3.91645	1.02427	5.11047	2.89044	4.10383	2.41672	1.9022	9.05084
4.20407	0.826136	6.12641	4.55524	4.93751	1.45033	1.84281	13.8188
3.79738	1.68199	3.54408	4.60732	4.39151	1.47326	3.61059	5.55604
2.68136	2.64704	2.73546	3.31988	3.77475	1.01078	2.70671	10.3763
5.36968	1.24222	1.63838	3.43848	4.77624	1.65277	4.46214	5.90998
2.24924	2.77524	3.83788	4.01179	6.93473	1.58639	2.4128	2.46925
4.45195	1.47997	3.96204	5.26373	6.93896	0.89396	1.37472	4.41707
2.76316	2.14316	3.39493	3.69103	3.54993	1.35568	1.63962	7.40351
4.3527	3.61016	3.07772	4.03722	5.20712	1.1548	1.32293	8.46498
2.88272	1.43476	2.6085	2.95578	2.7846	1.21579	1.30498	8.24732
2.65678	1.09062	2.47842	5.0541	7.56926	1.80069	1.42612	3.65424
1.9905	1.79327	6.09325	3.46489		1.90287	2.50104	5.76584
			5.43496		2.72434	8.5996	11.5363
			4.45859		1.88115	2.23638	6.68726
					1.96822	3.42232	5.22322
						4.29199	2.43484
							9.52497
