# Supplementary material for: Phosphatidylinositol 3-phosphate and Hsp70 protect Plasmodium falciparum from heat-induced cell death
Source: eLife. 2020 Sep 25;9:e56773. doi: 10.7554/eLife.56773 (PMC7518890; doi:10.7554/eLife.56773)
Supplement: Figure 3—source data 1. [file elife-56773-fig3-data1.xlsx]

## Sheet: DV MFI (AU)
no HS				HS					no HS		HS
DMSO	Wort	LY294	LY303	DMSO	Wort	LY294	LY303		DMSO	ART	DMSO	ART
25728.7	23411.9	41362.1	21260.8	23678.5	11553.4	18534	21419.4		25021.5	22031.9	19497	15180.5
30977.7	19794.9	22471.5	21601.4	33147.9	14720.8	11133.4	32516.7		36161.5	48517.7	19877.4	9314.02
23620	23366.8	24563.3	26849.2	20051.2	21779.2	17308	28346.4		26941.4	24903.7	28461.9	25512.8
37034.8	22360.5	37235.7	28926.7	20267.2	9460.4	10330.3	34282.9		16703.2	19825.2	14986.9	13646.1
20383	21061.3	22922.4	13587.3	24426.5	11889.3	16687.6	22828.4		30376	21874.1	16384.2	10635.6
21013.1	13832.1	31700.5	15392.2	11479.5	20154.2	15650.8	46284.3		23963.7	19209.9	23890.6	20597.6
17135.6	22284.5	13054.9	32114.5	29439.1	12634.4	9913.73	25196.5		30165.5	29317.2	25889.9	25785.6
27596.2	12058.7	31486.3	19367.1	25593.1	10099.8	15673.5	42308.6		30045.6	24462.7	22049.2	17119.3
27051.2	19710.1	19855.4	22427	23814.2	25030	14923.5	17010.7		18772.4	19803	31154.7	10940.6
22942.5	15359.2	48976.7	21252.2	24770	13287	16989.8	35914		20241.9	33909	30501	18282
33947.7	23531.8	14066.9	18555.3	15569.6	11461.9	9862.51	19778.9		21020.1	25186.4	22548.3	17319.4
24231.4	16320.2	40621.3	40348	6289.4	16382.4	13044.9	23527.2		20389.9	25370.6	28548.2	15383.7
16993.3	20133.4	21623.9	19068.5	9819	11720.8	14414.1	29323.2		21513.9	24919.9	28480.9	29672.9
33063.4	27050.9	25739.8	19924.1	24703.1	7510.82	13118.1	16393.4		27818.6	28322.2	31887	14810.1
17090.3	26856	48324.5	26389.1	16979.8	12003.9	20906.5	41961.6		39346.8	21435.9	36570.3	20265.8
28851.4	24338.3	20240.7	39981	18399.7	9913.65	16431.9	22317.7		24729.4	36584.5	26051.5	17033
10291	8508.25	22184	28753.9	25497.6	11502.2	11763.2	37375.8		21749.5	28171.8	14697.8	16998.9
15302.3	24994	21614.8	12575.4	18021.8	10815.8	9372.24	15799.4		27992.5	49842.1	20440.4	20671.4
21704.3	13115	36069.1	16142.4	21014.3	21187.7	27420.8	16023.5		19042.8	36660.2	35807.5	7854.67
23655.8	12719.1	26829.9	23598.1	17356.3	11724.6	25898.9	19241.7		19339.5	48377.9	49751.6	19537.8
36909.1	16249.8	45134.4	45194.5	21273.3	10460.6	7036.67	27499.9		28142.6	14668.1	15235.2	17658.1
19768.5	16599	15619.3	31391.8	29077.6	7281.39	11718.6	18513.6		23276.5	28255.8	35142.9	16048.6
18137.3	20083.7	28452.9	17373.7		16772.3	8255.58	19761.9		33150.7	18911	17640.5	14081.8
19743	23118.5	21401.2	21213.9		14530.9	6784.41	14274.5		46146.3	33096.3	28739.9	15820
27700.2	10668.8	28818.3	21251.1		18997.1	6716.23			28332.7	27856.8		23480.9
23108.4		13587.3	21908.4						10213.8	38889.9		8194.47
			17382.9						17365.2	30047		13309.6
									37449.5	21891.9		13560
									20917.8	22787.8		13604
									51041.7	26020.9		25736.1
									28713.8	21343.3		12514.9
									21674.2
