# Supplementary material for: Phosphatidylinositol 3-phosphate and Hsp70 protect Plasmodium falciparum from heat-induced cell death
Source: eLife. 2020 Sep 25;9:e56773. doi: 10.7554/eLife.56773 (PMC7518890; doi:10.7554/eLife.56773)
Supplement: Figure 4—source data 1. [file elife-56773-fig4-data1.xlsx]

## Sheet: JC-1 red to green ratio
DMSO (no HS)	LY294 (no HS)	LY294 (HS)	Wort (no HS)	Wort (HS)	CCCP (no HS)
1.57958	0.930128	1.23802	0.917324	0.0439709	0.367084
1.25336	1.27081	0.672285	1.57995	0.0504821	0.455423
1.39396	1.87555	1.38539	1.14745	0.340114	0.812228
0.938067	2.52671	1.37856	0.477649	0.472653	0.0760154
1.48502	0.899836	1.72221	0.323427	0.0583642	0.233443
0.606335	1.72269	1.14191	0.427725	0.107815	0.0937997
0.880681	0.9953	1.45594	0.978829	1.62379	0.50695
0.664252	0.296449	2.09481	1.08243	0.793626	0.241964
0.800507	0.996377	1.80331	0.485918	0.0691009	0.181778
0.772279	0.619503	0.738938	0.613528	1.68609	0.458775
0.516173	1.04589	1.86445	0.78796	0.807627	0.374689
0.778164	1.14694	1.31018	0.801151	0.198827	0.128892
1.94338	0.54482	0.388255	1.73077	0.431515	0.285994
1.11092	0.932612	2.57255	0.171153	0.0441491	0.297793
1.52394	0.509827	0.624601	0.668383	1.45723
0.987363	0.882576	0.521022	1.22217	0.0481152
1.19325	0.933668	2.29395	0.569373	0.128627
1.06916	0.623711	0.816768	1.57965	0.30658
1.4432	2.32322	1.72773	0.824692	0.759218
0.524426	0.940862	1.40459	1.40997	0.28681
1.70146	2.10599	1.43415	0.88588	0.624158
3.75137	0.973822	1.603	0.586785
0.929712	1.28206	3.1044	0.675138
0.53285		1.15858	1.11385
0.781983		1.61197	1.56222
2.2863		1.45969
0.783528		0.837541
1.83634		1.46149
1.43015		1.773
1.66317		1.13061
0.678309		1.6741
1.60814
1.19094
1.15789
1.66239
