# Supplementary material for: Phosphatidylinositol 3-phosphate and Hsp70 protect Plasmodium falciparum from heat-induced cell death
Source: eLife. 2020 Sep 25;9:e56773. doi: 10.7554/eLife.56773 (PMC7518890; doi:10.7554/eLife.56773)
Supplement: Figure 5—source data 1. [file elife-56773-fig5-data1.xlsx]

## Sheet: DV MFI (AU)
DMSO (no HS)	LY294 (HS)	LY294 (HS)+wash	LY294 (HS)+no wash
23699.1	9942.55	15520.1	15574.6
20790.3	33053.3	19899	9507.58
17100	19493.7	19224.4	5420.77
20263.5	7718.43	15658.3	10965.5
21776.2	11156	23506	16052.7
20652.1	14373.5	19923.6	13956.3
30786.9	11438.5	22831.7	10973.8
15043.7	9095.12	19850.9	15902.1
23101.7	11198.9	38025.2	13168
20082.3	18271.8	11746	7288.5
19264.7	8654.95	9580.42	21138.3
18700.8	6133.35	19959.2	9857.95
21347.8	11124.3	19528.8	12978
24047.3	14987.1	24327.8	17777.3
15312	9139.57	15350.5	6065.72
21623.5	13907.7	12242.9	15790.7
26248.7	8464.27	28108.2	10169.5
28925.8	8188.4	20215.6	21868.6
14961.9	6498.4	28857.5	13032.6
29863.5	6821.77	16182.9	8025.33
18069.3	12844.5		9408.45
16056.2
20938.4
