# Supplementary material for: Phosphatidylinositol 3-phosphate and Hsp70 protect Plasmodium falciparum from heat-induced cell death
Source: eLife. 2020 Sep 25;9:e56773. doi: 10.7554/eLife.56773 (PMC7518890; doi:10.7554/eLife.56773)
Supplement: Figure 7—source data 1. [file elife-56773-fig7-data1.xlsx]

## Sheet: DV MFI (AU)
Figure 7A			Figure 7B
no HS	HS		50 nM aTc		500 nM aTc
30574.8	23010.4		no HS	HS	no HS	HS
31963	10632.3		22572.9	5910.37	15519.9	4483.42
25097.9	25635		26664.3	9116.16	26588.4	12502.6
25698.4	16899.5		19473.5	8743.88	18400.7	21190.2
23849	22117.7		25767.4	7434.86	16868.1	7223.65
36915.4	18657.7		24536.4	16395.5	15507.8	10272.2
32036.7	15139.8		20028	8311.87	15785.6	9339.69
30359.7	9789.48		19132.3	6395.81	17388.3	9324.84
16948.4	9335.66		24585.7	6350.06	28737.3	8046.8
12050.9	13732.1		23617.3	7983.9	22242.7	9332.62
34443.6	14454.2		23961.6	4457.75	30822.6	5089.79
19895	16773.5		30898.4	11438.3	16813	10733.6
41039.6	22066.7		8472.32	11319.5	20445.8	9624.29
33703	11822.6		26927.9	6759.17	26863.9	10849.7
25589.9	8286.38		15656.3	5972.44	20468.5	7367.53
43242.3	22421.1		16359.4	8024.31	23650.5	8307.39
38732.3	23580.8		12335.9	20872.6	25017.1	12791.2
32586.4	52918		17051.5	10723.6	25205.1	6468.53
47930.9	6603.89		19062	37538.9	23325.6	5498.64
28099	26657.3		19743.5	8236.39	31960.1	9995.51
32984.1	37924.4		15533.9	9042.4	14272.5	6813.33
31623.2	20596.3		16916.6	12049.9	26780.4	6011.16
19935.2	9111.17		15444.8	9867.39	28634.1	12339.4
9484.31	41399.6		24551.6	14633.1	17017.3	4607.17
15409.2	24040.6		25898.8	9918.17	24956.1	10414.7
33231.1	12208		10178.4	22780.6	18851.7	13520.1
25315.3	25829.1			11368.2	18186.7	5960.68
25325				7741.65	18840.2	10761.5
				6920.63	11996.1	7007.97
					29291.5
					13631.4
					24770
